# Supplementary material
Source: PubMed Central journal article supplement (PMC1201287)

Figure S1

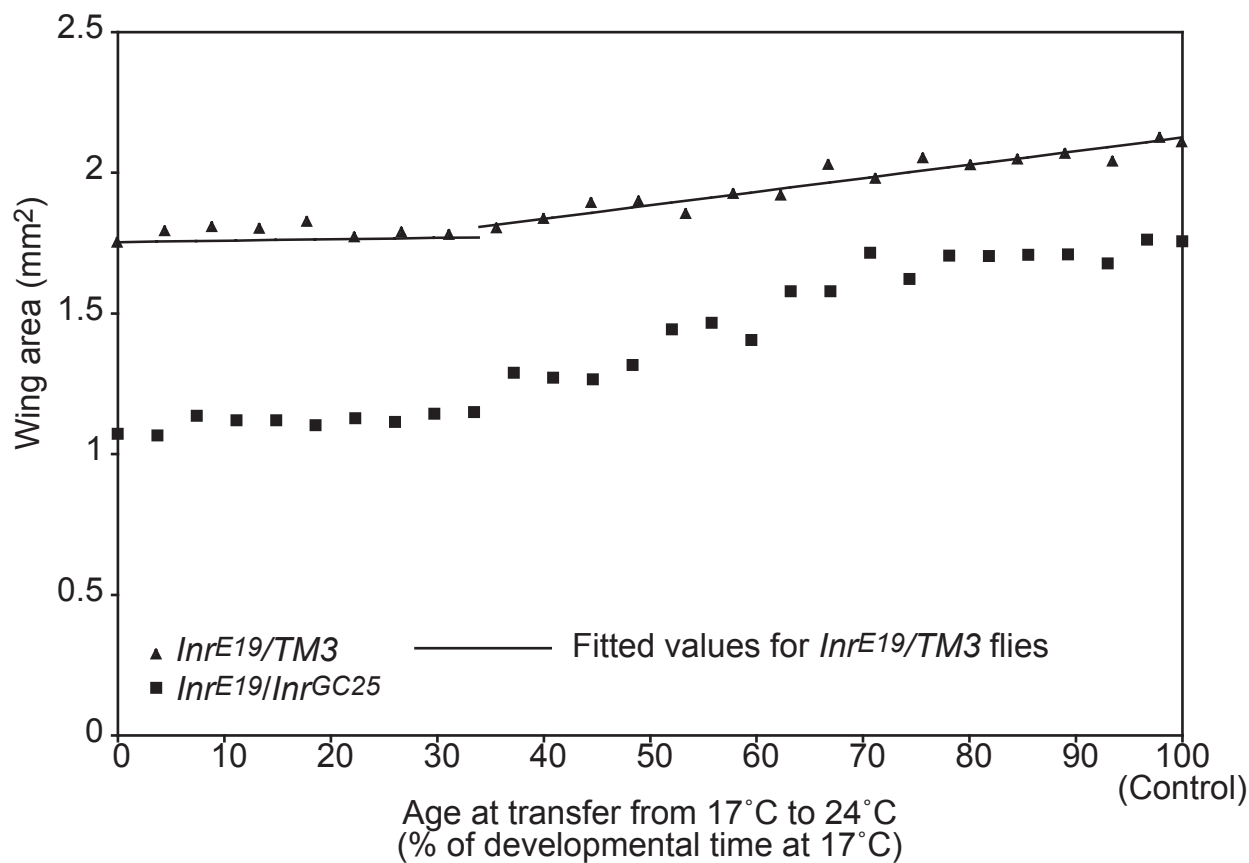

Supplement: pbio.0030289.sg001.pdf [file pbio.0030289.sg001.pdf]
